# Supplementary material for: Potent and Selective Inhibitors of Human Monoamine Oxidase A from an Endogenous Lichen Fungus Diaporthe mahothocarpus
Source: MDPI journal article supplement (doi:10.3390/jof7100876), 2021-10-18
Supplement: s1 [file s1]

Supplementary Material

# Potent and Selective Inhibitors of Human Monoamine Oxidase A from an Endogenous Lichen Fungus *Diaporthe mahothocarpus*

Geum Seok Jeong <sup>1</sup>, Prima F. Hillman <sup>2</sup>, Myung-Gyun Kang <sup>3</sup>, Sungbo Hwang <sup>3</sup>, Jong-Eun Park <sup>1</sup>, Sang-Jip Nam <sup>2</sup>, Daeui Park <sup>3</sup> and Hoon Kim <sup>1,\*</sup>

<sup>1</sup> Department of Pharmacy, and Research Institute of Life Pharmaceutical Sciences, Sunchon National University, Suncheon 57922, Republic of Korea; fever41@naver.com (G.S.J.); nji8009@naver.com (J.I.N.); park140201@naver.com (J.E.P.); sungtae@scnu.ac.kr (S.T.Y)

<sup>2</sup> Department of Chemistry and Nanoscience, Ewha Womans University, Seoul 03760, Republic of Korea; pri-mafitriah@gmail.com (P.F.H); sjnam@ewha.ac.kr (S.J.N)

<sup>3</sup> Department of Predictive Toxicology, Korea Institute of Toxicology, Daejeon 34114, Republic of Korea; myung-gyun.kang@kitox.re.kr (M.-G.K.); sungbo.hwang@kitox.re.kr (S.H.); daeui.park@kitox.re.kr (D.P.)

\* Correspondence: Correspondence: hoon@sunchon.ac.kr; Tel.: +82-61-750-3751

## Table of Contents

|                                                                                                                                                      |
|------------------------------------------------------------------------------------------------------------------------------------------------------|
| <b>Figure S1. Percentage purity of AT (1)</b>                                                                                                        |
| <b>Figure S2. Percentage purity of HAT (2)</b>                                                                                                       |
| <b>Figure S3. Percentage purity of MED (3)</b>                                                                                                       |
| <b>Figure S4. <sup>1</sup>H NMR spectrum of alternariol (AT) (1) in CD<sub>3</sub>OD</b>                                                             |
| <b>Figure S5. <sup>13</sup>C NMR Spectrum of alternariol (AT) (1) in CD<sub>3</sub>OD</b>                                                            |
| <b>Figure S6. COSY Spectrum of alternariol (AT) (1) in CD<sub>3</sub>OD</b>                                                                          |
| <b>Figure S7. HSQC Spectrum of alternariol (AT) (1) in CD<sub>3</sub>OD</b>                                                                          |
| <b>Figure S8. HMBC Spectrum of alternariol (AT) (1) in CD<sub>3</sub>OD</b>                                                                          |
| <b>Figure S9. <sup>1</sup>H NMR spectrum of 5'-hydroxy-alternariol (HAT) (2) in DMSO-<i>d</i><sub>6</sub></b>                                        |
| <b>Figure S10. <sup>13</sup>C NMR Spectrum of 5'-hydroxy-alternariol (HAT) (2) in DMSO-<i>d</i><sub>6</sub></b>                                      |
| <b>Figure S11. COSY Spectrum of 5'-hydroxy-alternariol (HAT) (2) in DMSO-<i>d</i><sub>6</sub></b>                                                    |
| <b>Figure S12. HSQC Spectrum of 5'-hydroxy-alternariol (HAT) (2) in DMSO-<i>d</i><sub>6</sub></b>                                                    |
| <b>Figure S13. HMBC Spectrum of 5'-hydroxy-alternariol (HAT) (2) in DMSO-<i>d</i><sub>6</sub></b>                                                    |
| <b>Figure S14. <sup>1</sup>H NMR Spectrum of mycoepoxydiene (MED) (3) in DMSO-<i>d</i><sub>6</sub></b>                                               |
| <b>Figure S15. <sup>13</sup>C NMR Spectrum of mycoepoxydiene (MED) (3) in DMSO-<i>d</i><sub>6</sub></b>                                              |
| <b>Figure S16. COSY Spectrum of mycoepoxydiene (MED) (3) in DMSO-<i>d</i><sub>6</sub></b>                                                            |
| <b>Figure S17. HSQC Spectrum of mycoepoxydiene (MED) (3) in DMSO-<i>d</i><sub>6</sub></b>                                                            |
| <b>Figure S18. HMBC Spectrum of mycoepoxydiene (MED) (3) in DMSO-<i>d</i><sub>6</sub></b>                                                            |
| <b>Figure S19. Plots of root mean square deviation (RMSD) during 1 ns MD simulation of the complex with (a) hMAO-A and AT, and (b) hMAO-B and AT</b> |

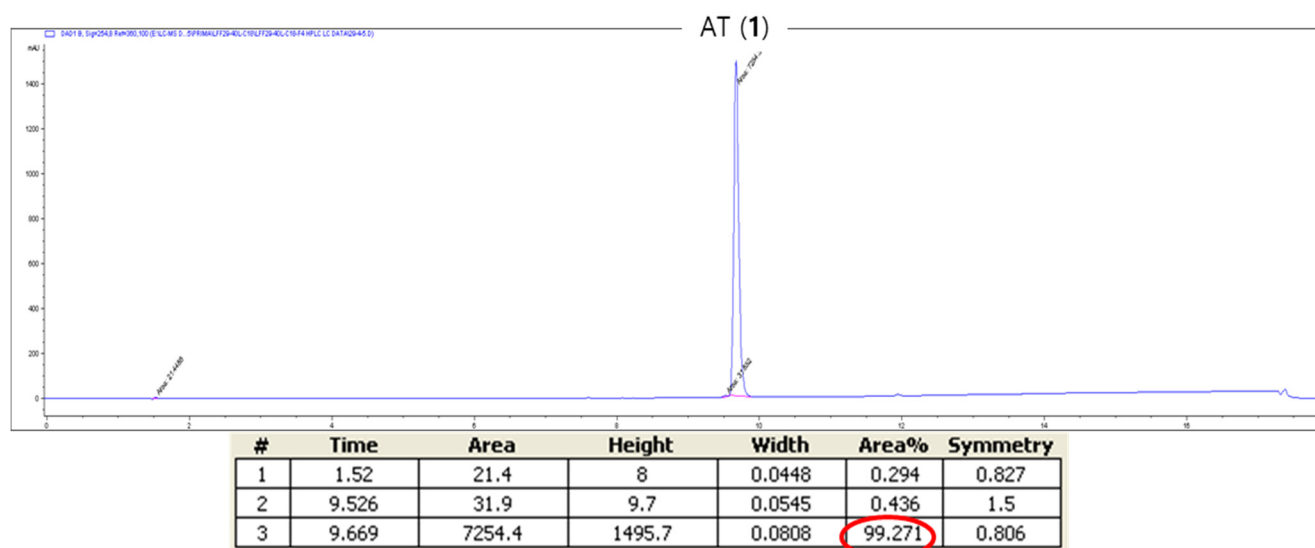

Figure S1. Percentage purity of AT (1).

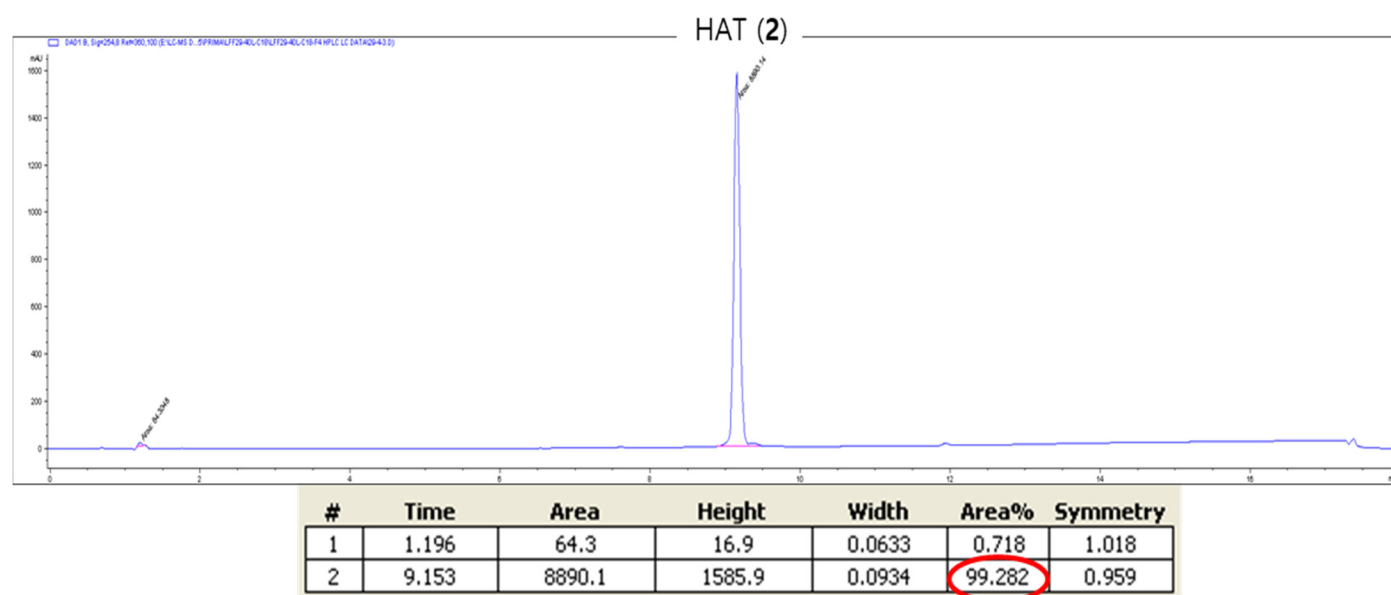

Figure S2. Percentage purity of HAT (2).

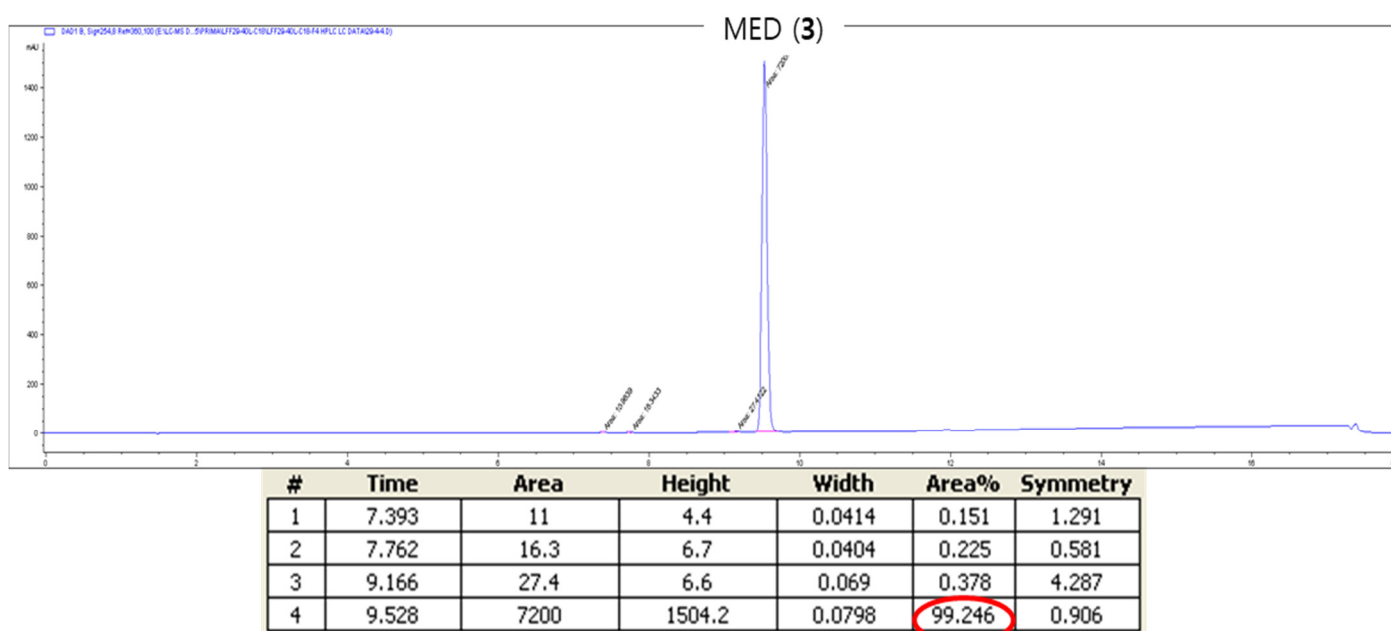

Figure S3. Percentage purity of MED (3).

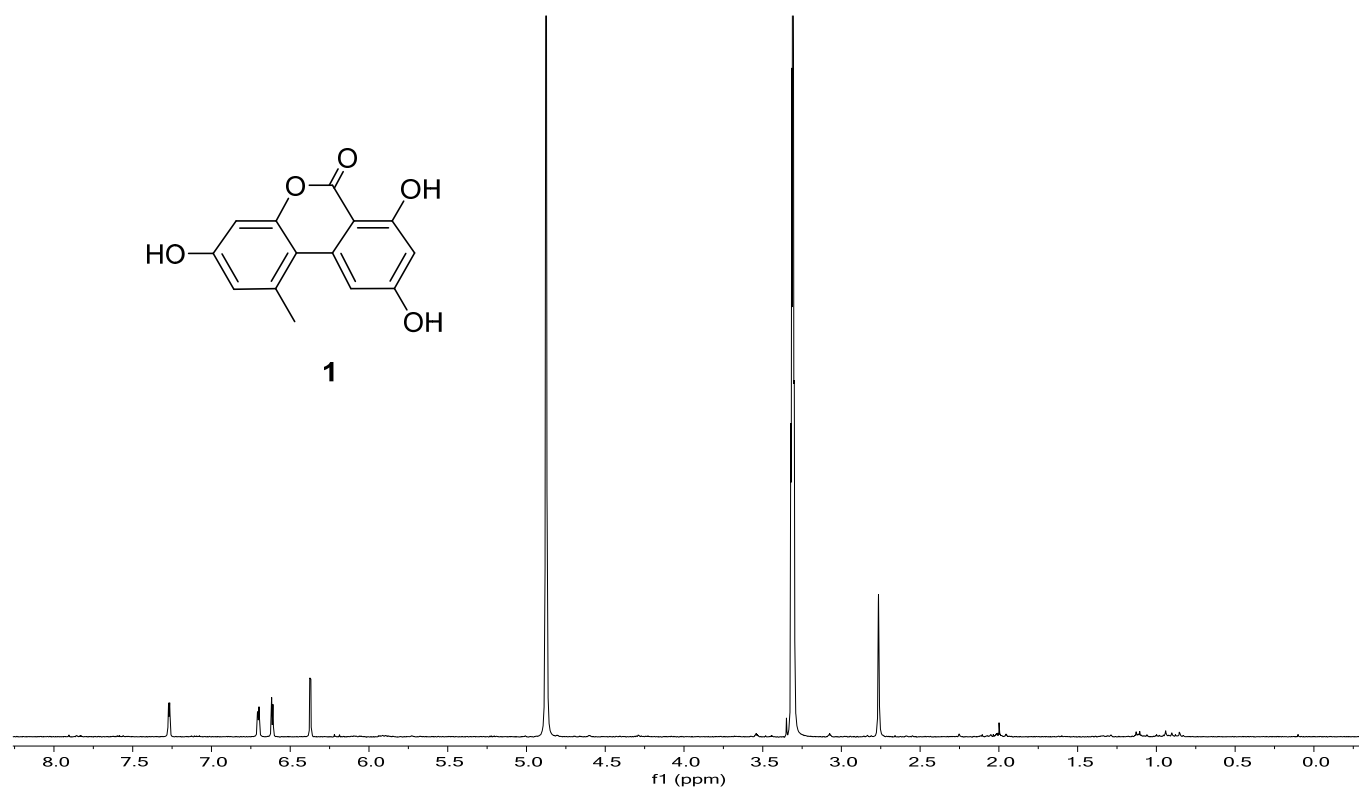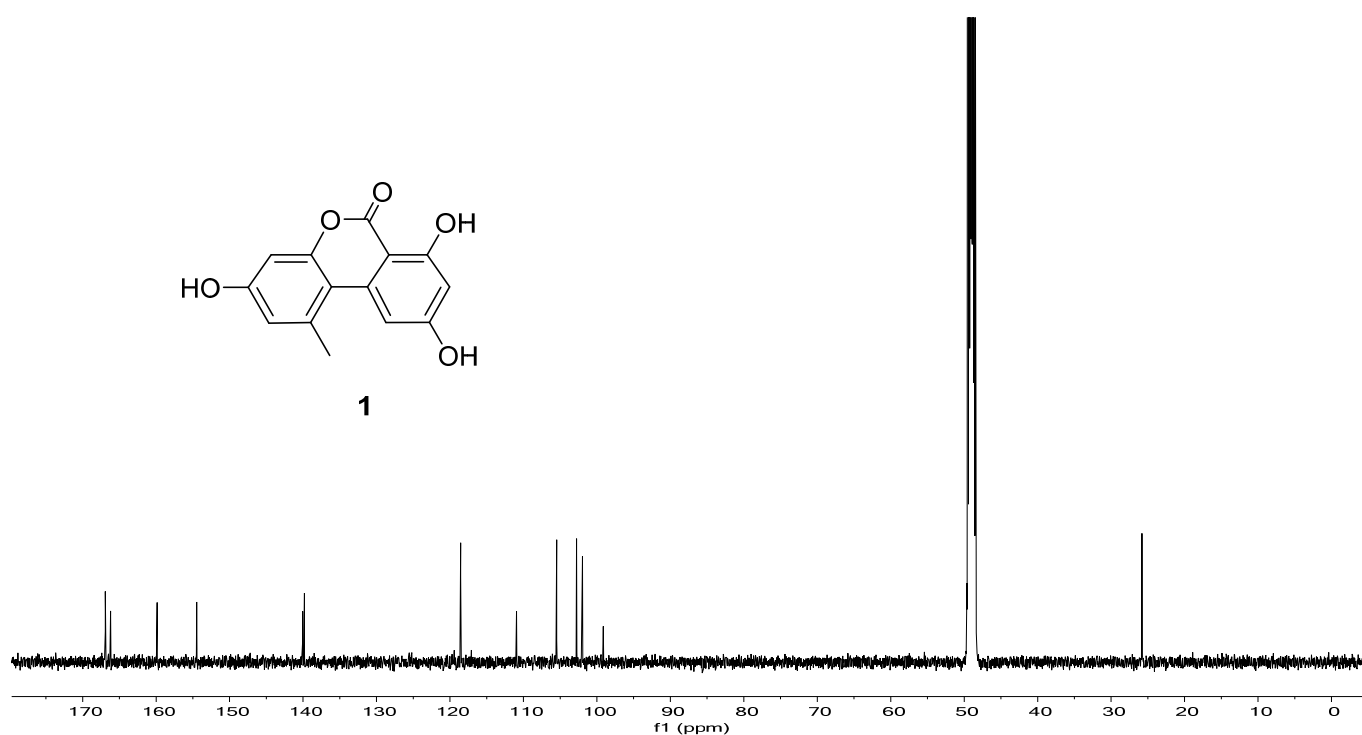

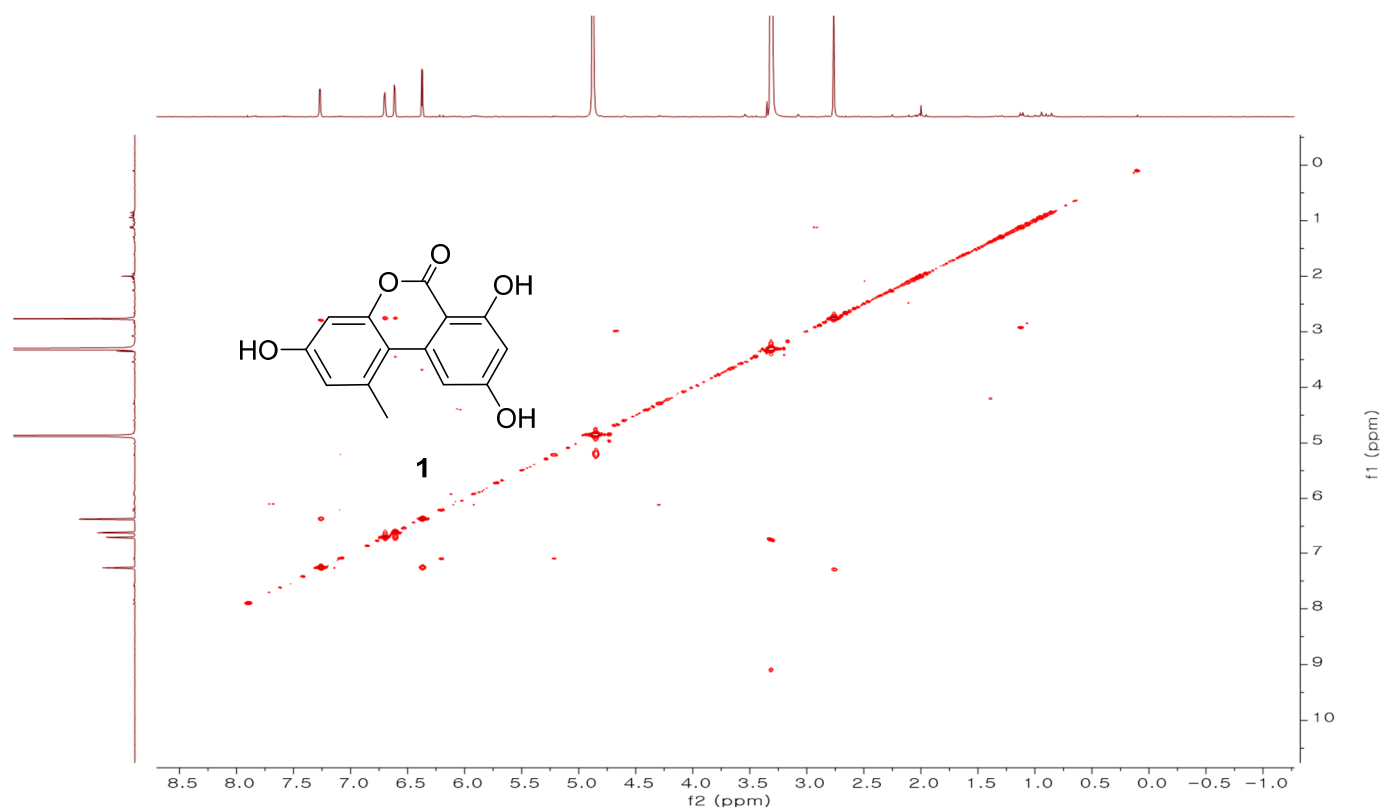

Figure S6. COSY spectrum of Alternariol (AT) (1) in CD<sub>3</sub>OD.

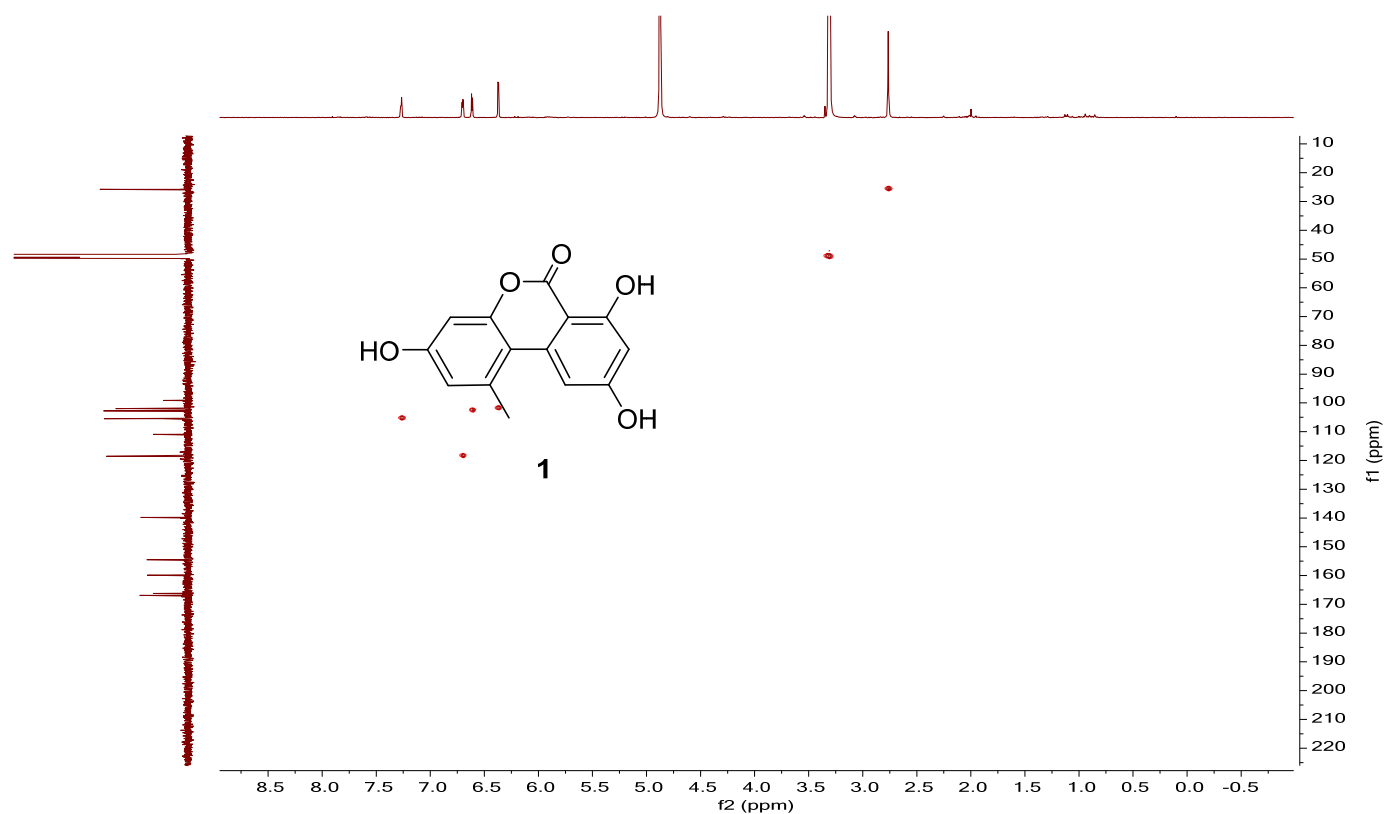

Figure S7. HSQC spectrum of Alternariol (AT) (1) in CD<sub>3</sub>OD.

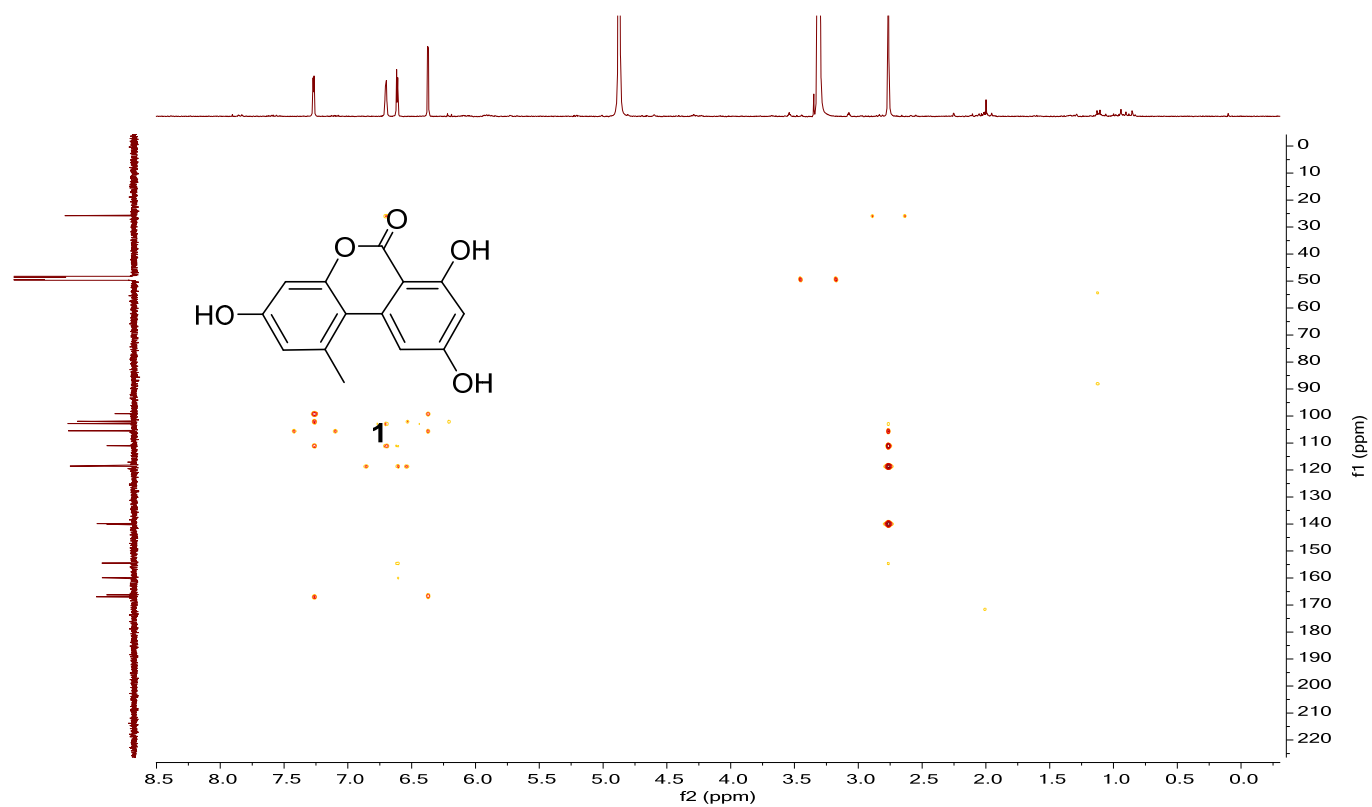

Figure S8. HMBC spectrum of Alternariol (AT) (1) in CD<sub>3</sub>OD.

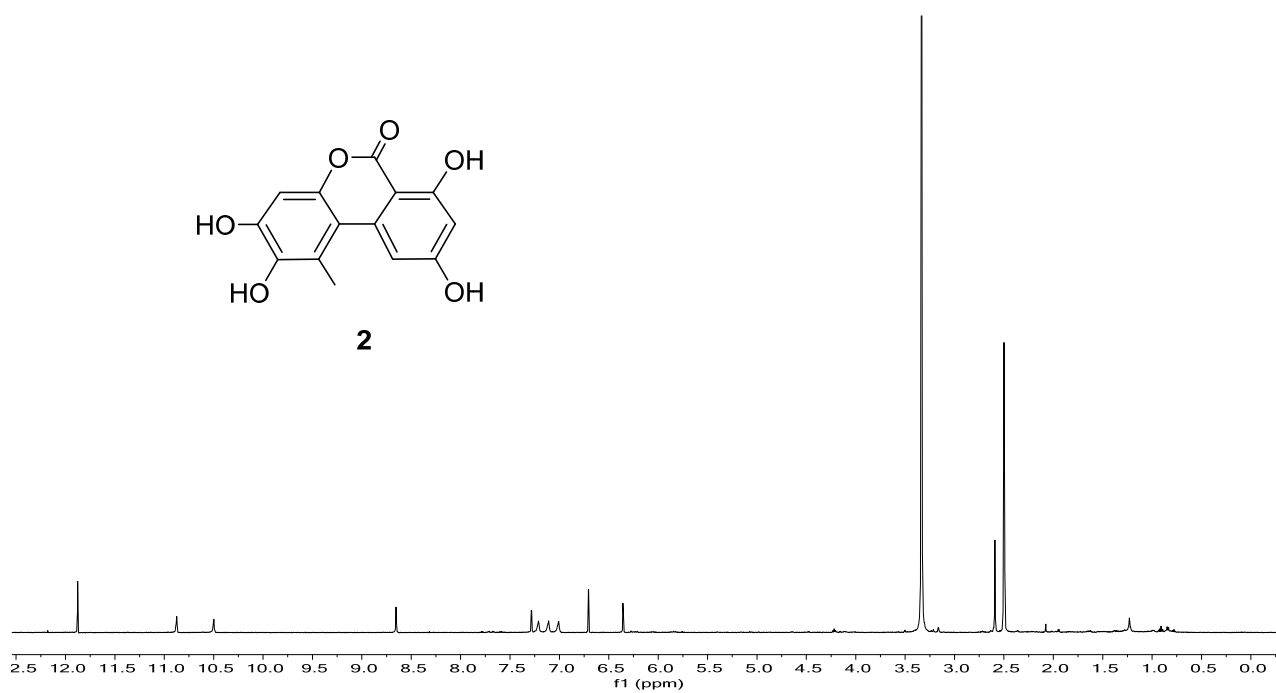

Figure S9. <sup>1</sup>H NMR Spectrum of 5'-hydroxy-alternariol (HAT) (2) in DMSO-*d*<sub>6</sub>.

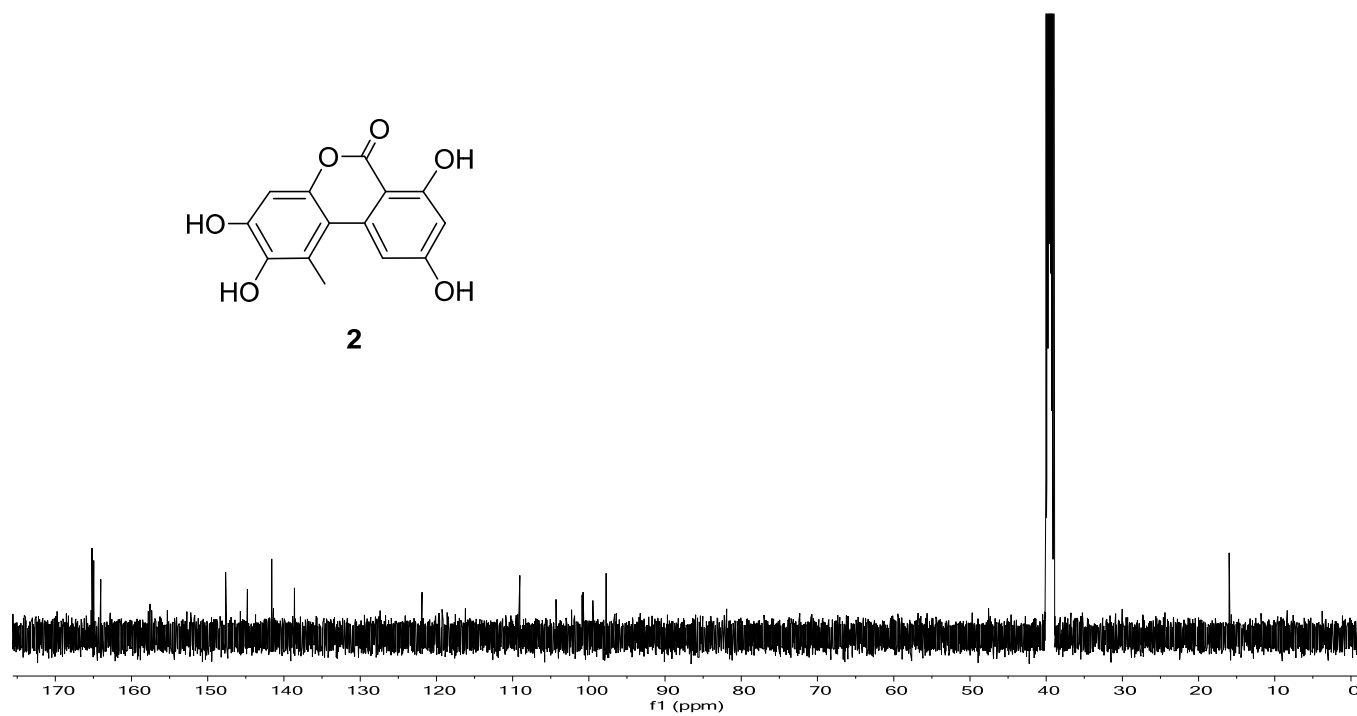

Figure S10.  $^{13}\text{C}$  NMR Spectrum of 5'-hydroxy-alternariol (HAT) (2) in  $\text{DMSO-}d_6$ .

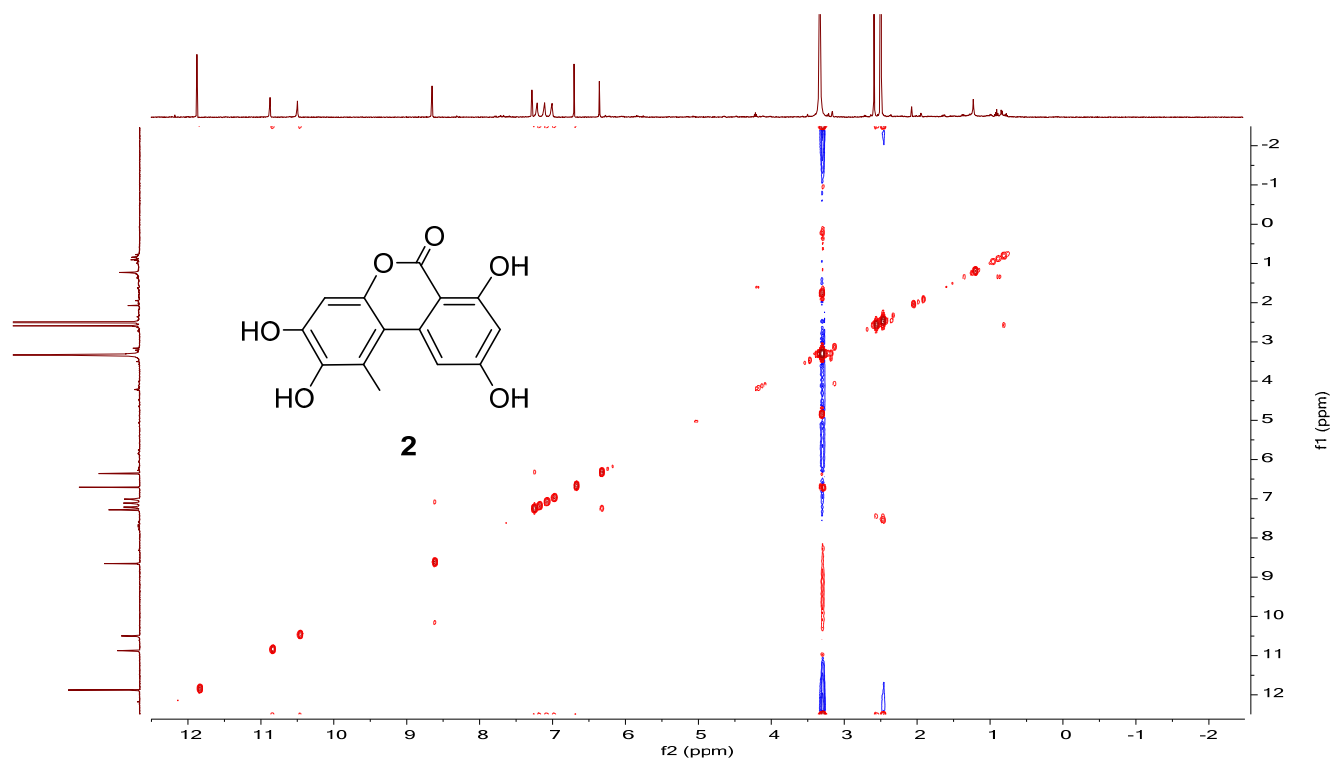

Figure S11. COSY Spectrum of 5'-hydroxy-alternariol (HAT) (2) in  $\text{DMSO-}d_6$ .

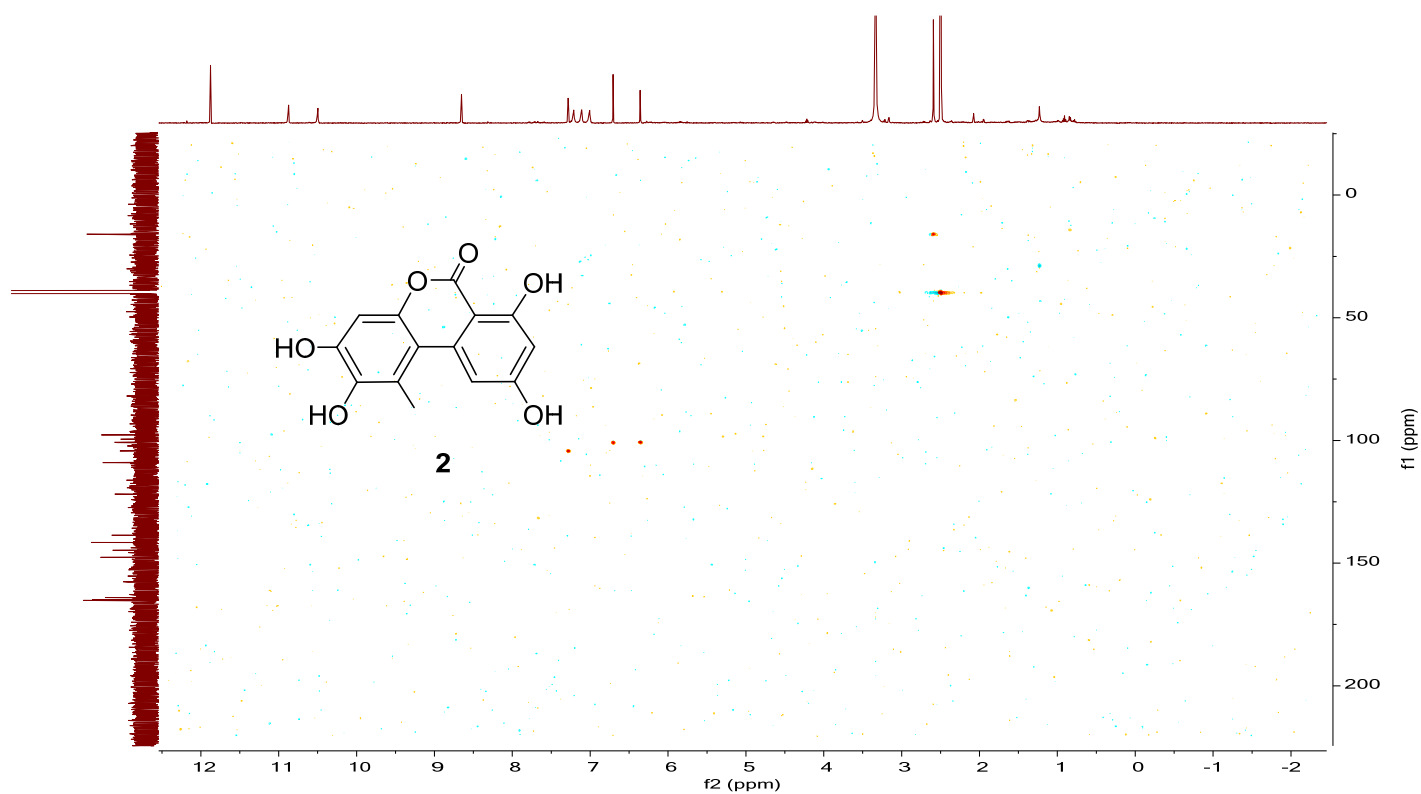

Figure S12. HSQC Spectrum of 5'-hydroxy-alternariol (HAT) (2) in DMSO- $d_6$ .

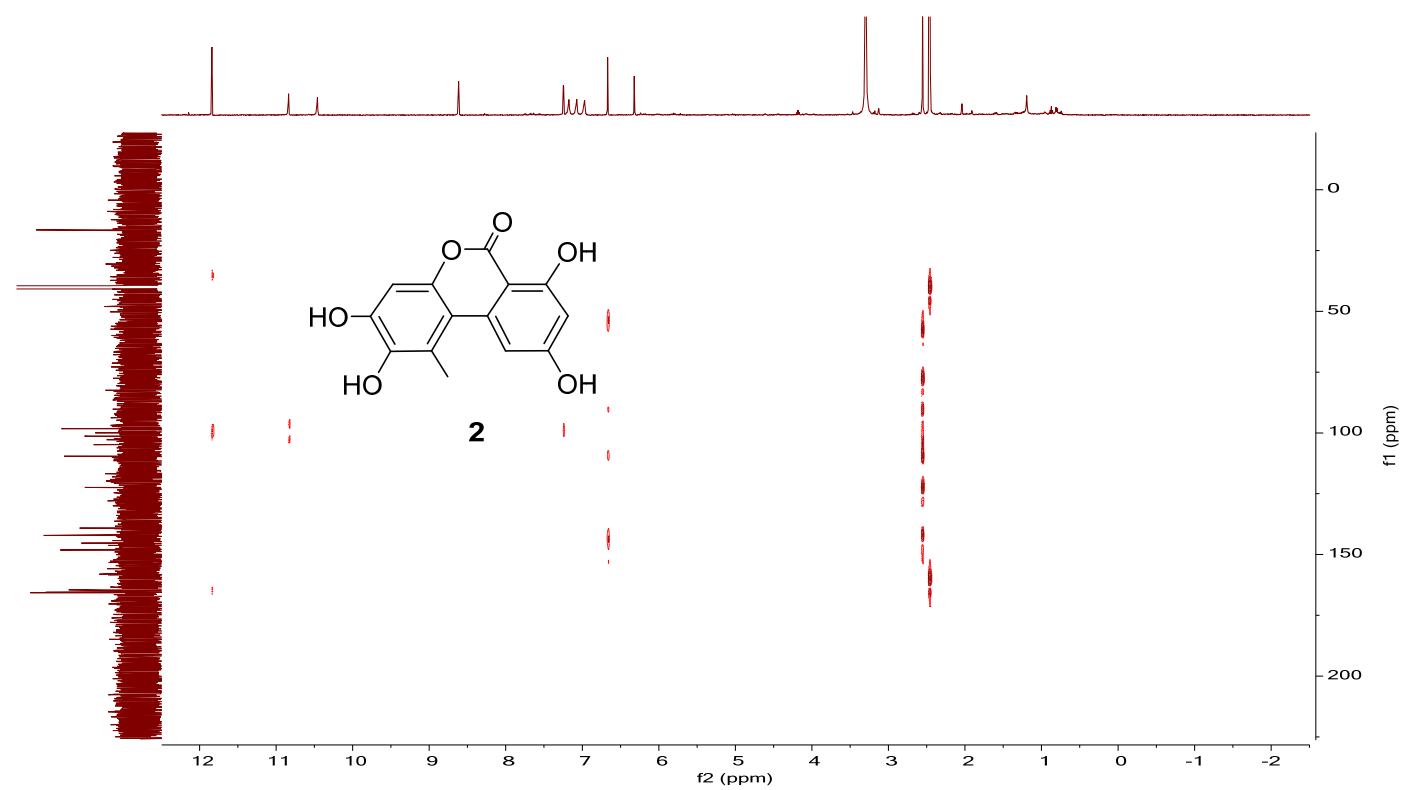

Figure S13. HMBC Spectrum of 5'-hydroxy-alternariol (HAT) (2) in DMSO- $d_6$ .

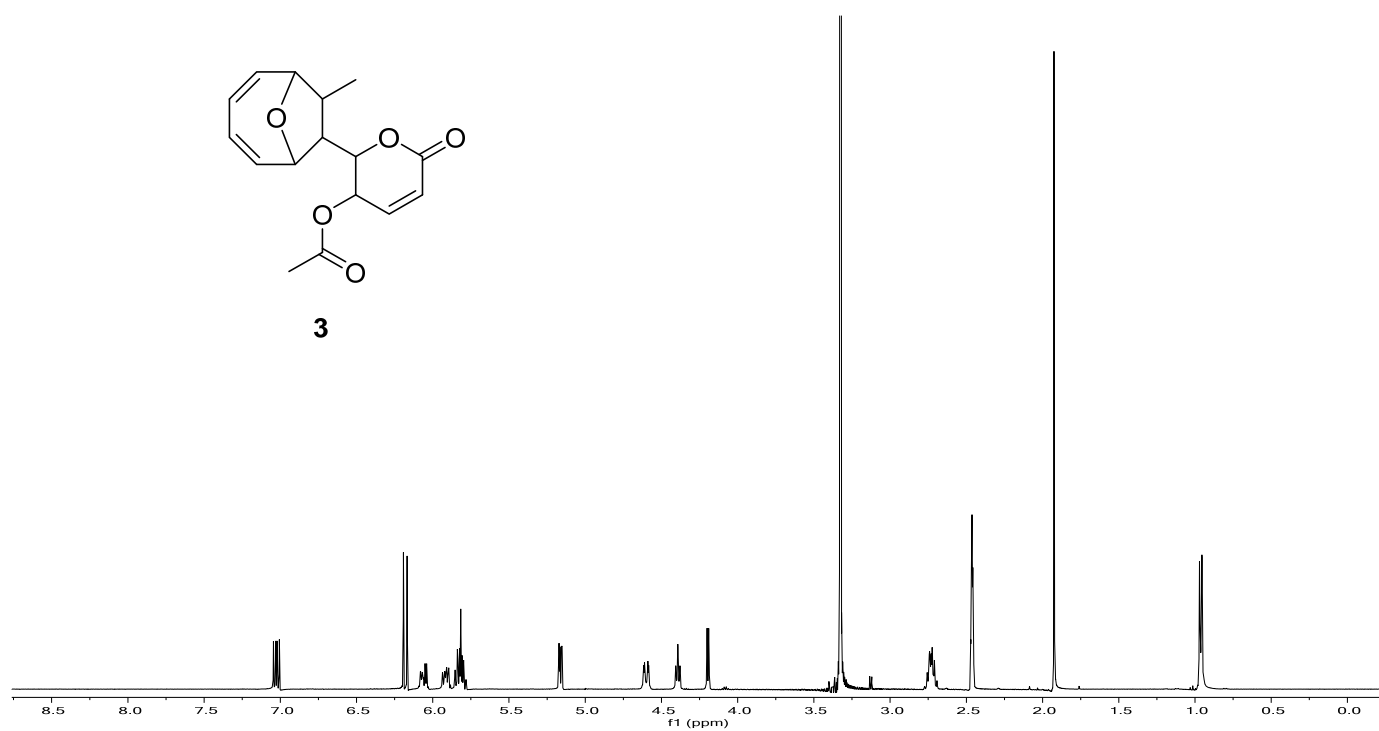

Figure S14. <sup>1</sup>H NMR spectrum of Mycoepoxydiene (MED) (3) in DMSO-*d*<sub>6</sub>.

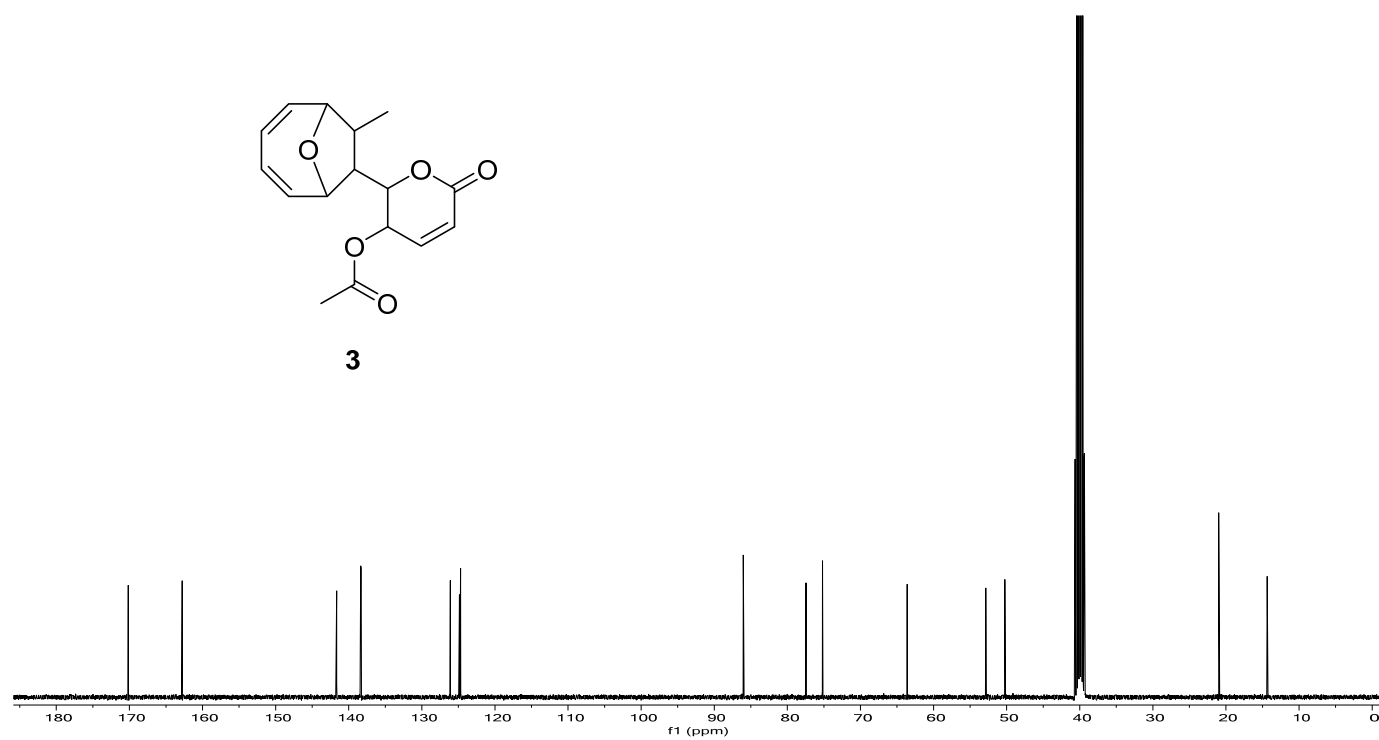

Figure S15. <sup>13</sup>C NMR Spectrum of Mycoepoxydiene (MED) (3) in DMSO-*d*<sub>6</sub>.

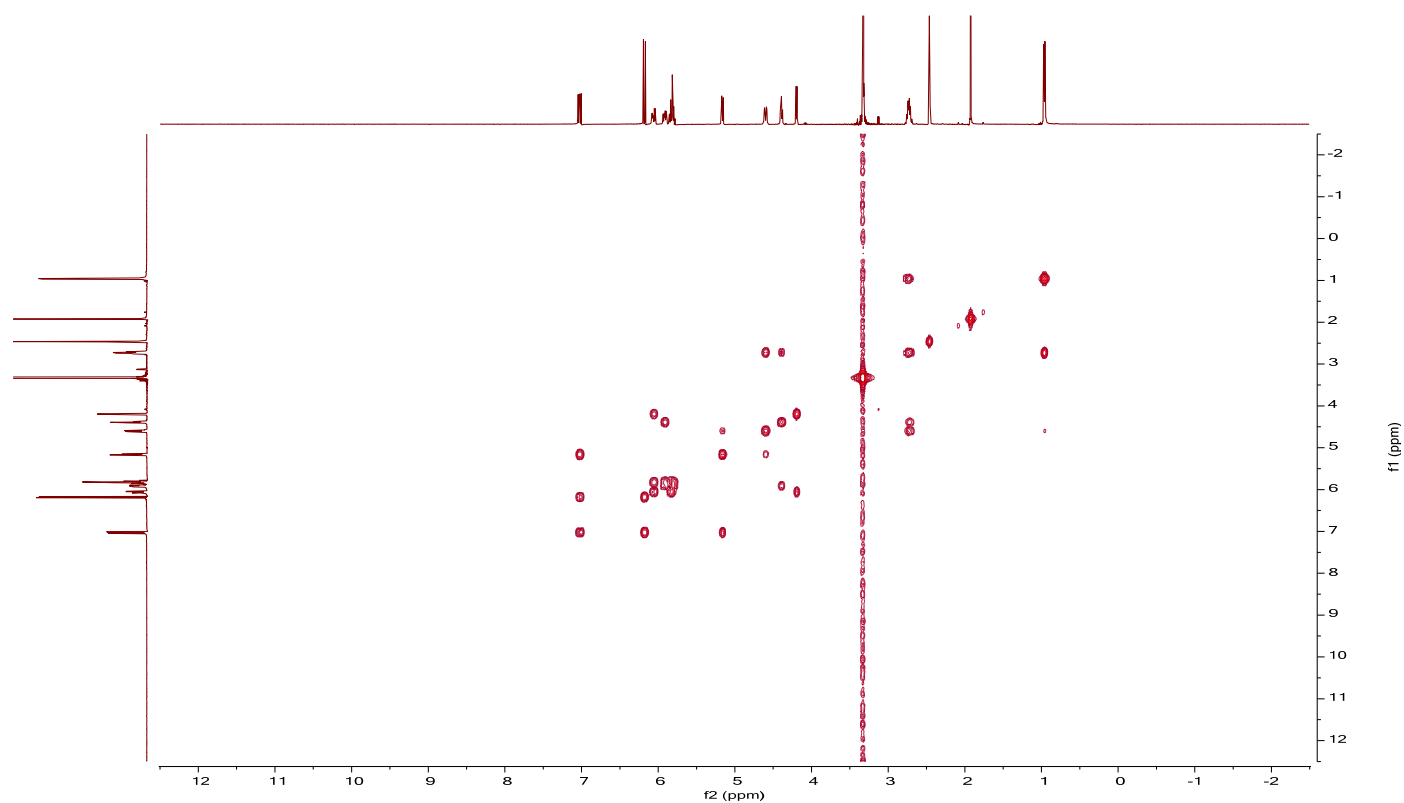

Figure S16. COSY Spectrum of Mycoepoxydiene (MED) (3) in DMSO-*d*<sub>6</sub>.

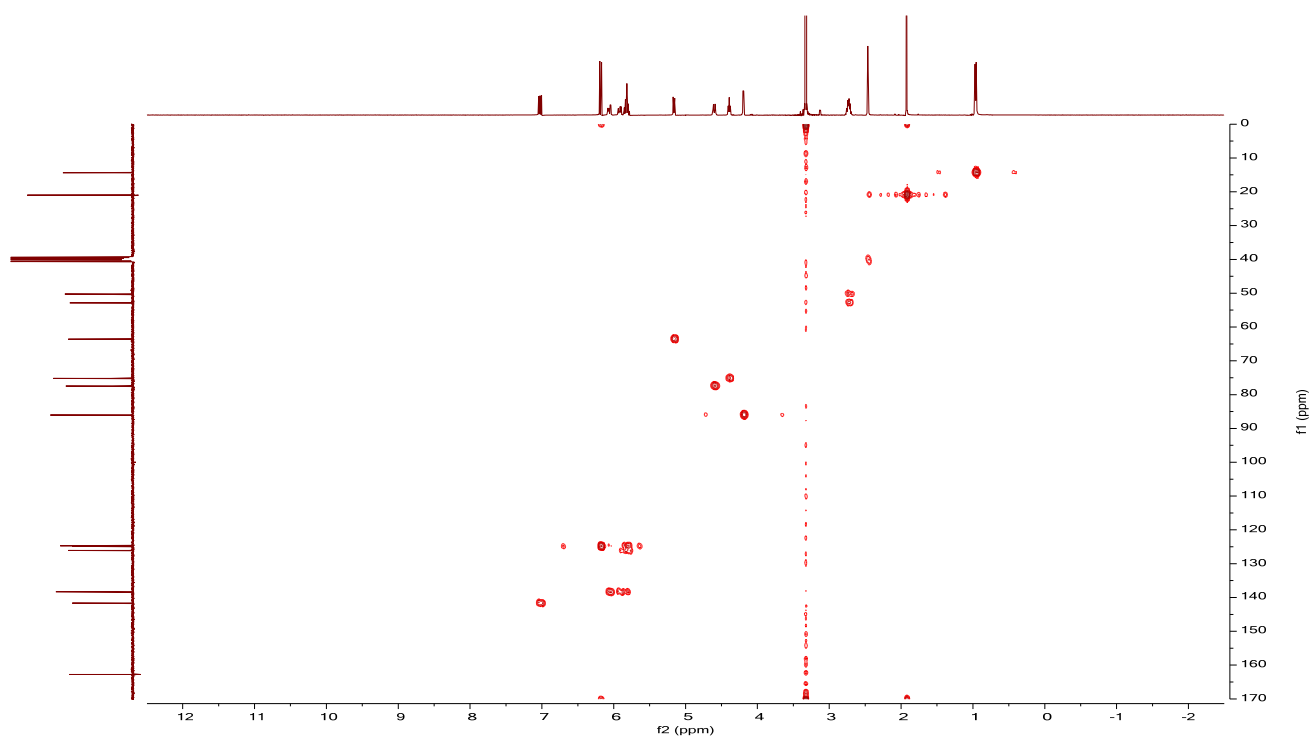

Figure S17. HSQC Spectrum of Mycoepoxydiene (MED) (3) in DMSO-*d*<sub>6</sub>.

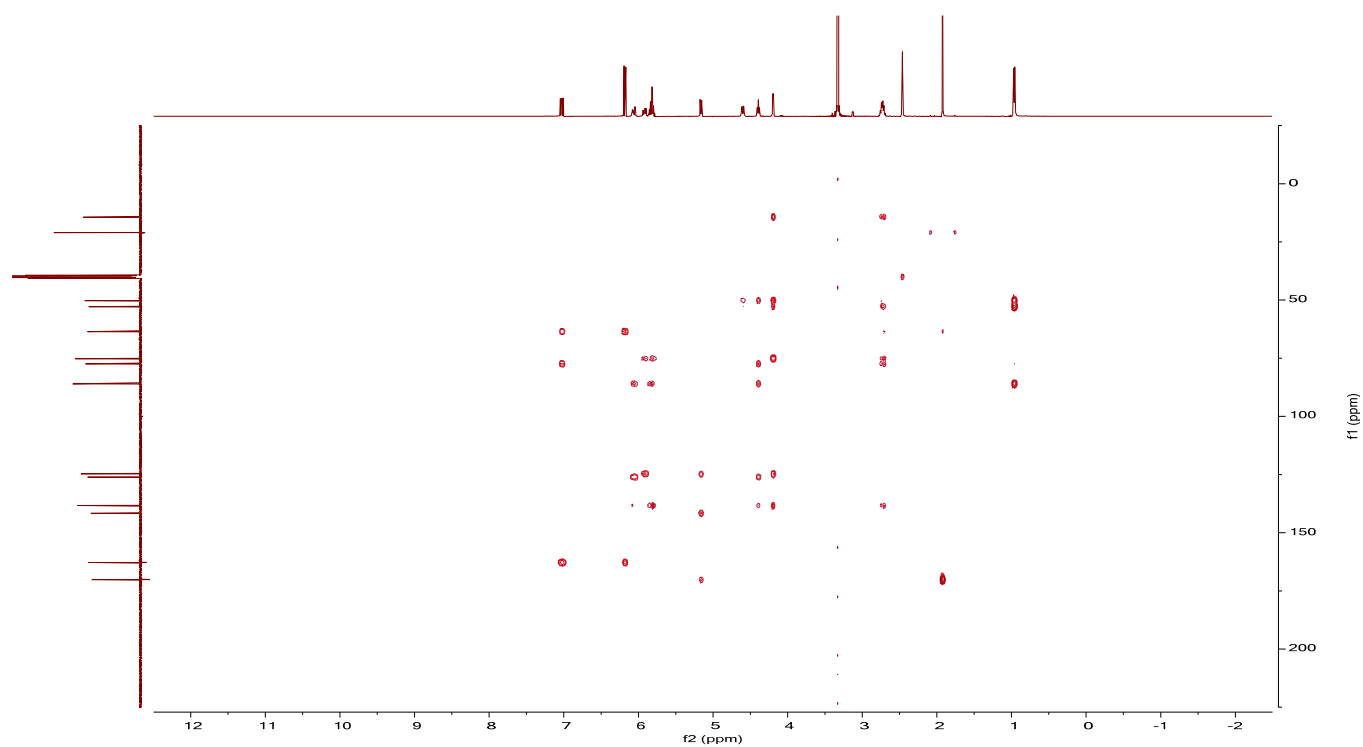

**Figure S18.** HMBC Spectrum of Mycoepoxydiene (MED) (3) in DMSO- $d_6$ .

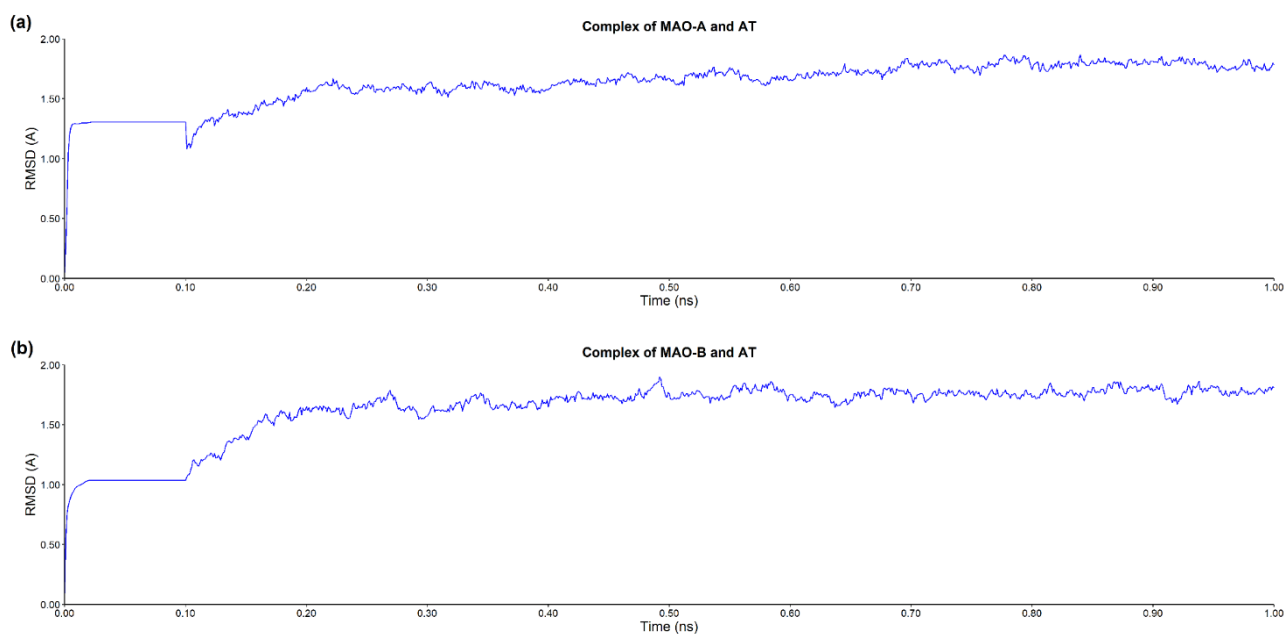

**Figure S19.** Plots of root mean square deviation (RMSD) during 1 ns MD simulation of (a) hMAO-A and (b) hMAO-B complexes with AT.
